# Supplementary material
Source: Springer Nature journal article supplement (https://www.springermedizin.de/resource/supplementary/40478_2013_134_MOESM8_ESM.pdf/25658058)
Supplement: MOESM8 [file 25658058]

**Title:** The *Arctic APP* mutation leads to Alzheimer's disease pathology with highly variable topographic deposition of differentially truncated A $\beta$

**Journal:** Acta Neuropathologica Communications

**Authors:** Hannu Kalimo<sup>1</sup>, Maciej Lalowski, Nenad Bogdanovic, Ola Philipson, Thomas D. Bird, David Nochlin, Gerard D. Schellenberg, RoseMarie Brundin, Tommie Olofsson, Marc Baumann, Oliver Wirths, Thomas A. Bayer, Lars N.G. Nilsson, Hans Basun, Lars Lannfelt, Martin Ingelsson

**Corresponding author:** <sup>1</sup>Hannu Kalimo, Department of Pathology, University and University Hospital of Helsinki, Helsinki, Finland,

**E-mail:** hannu.kalimo@helsinki.fi

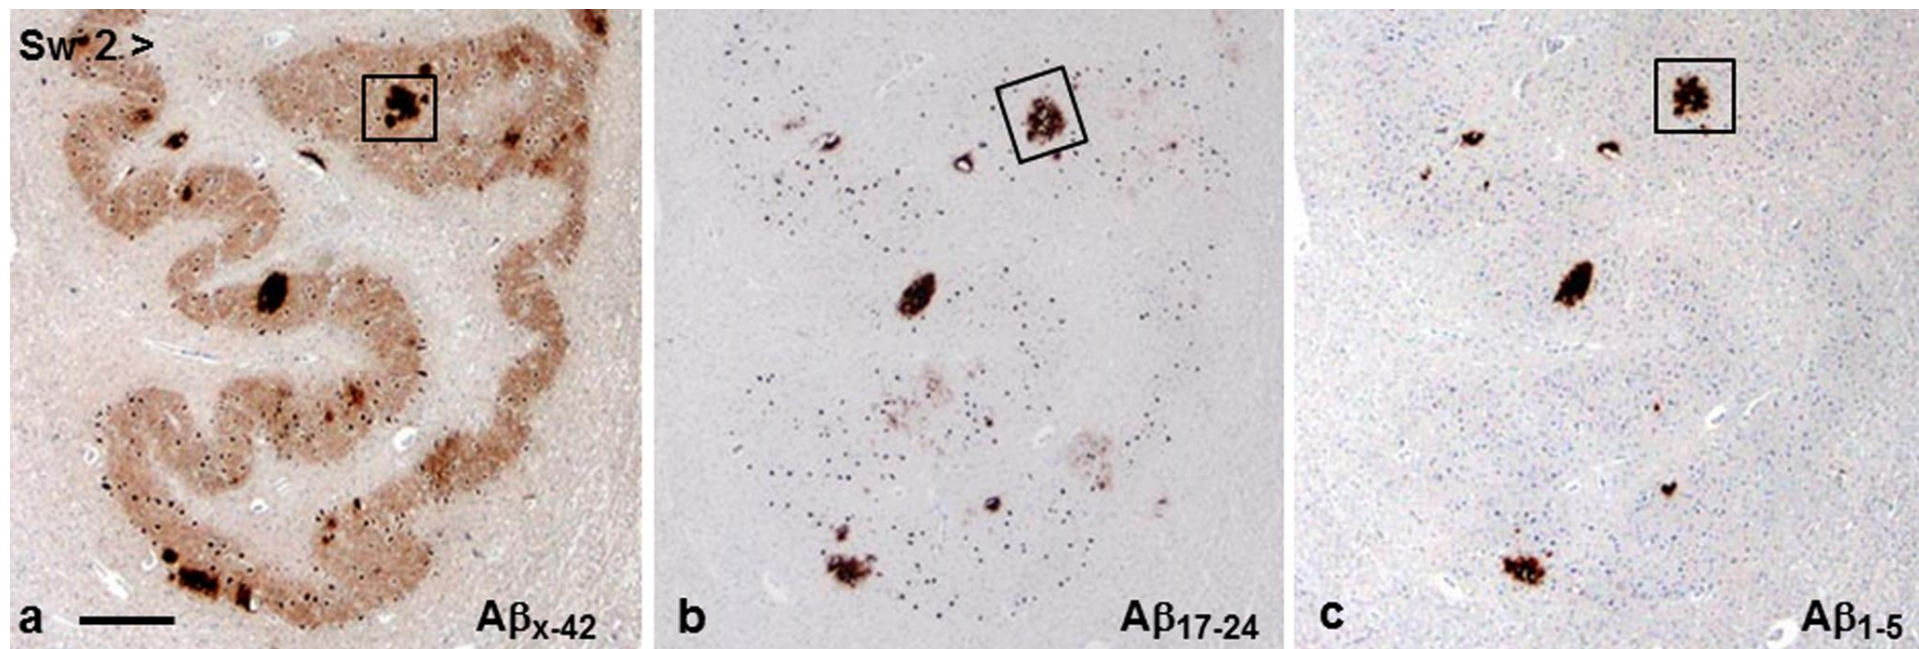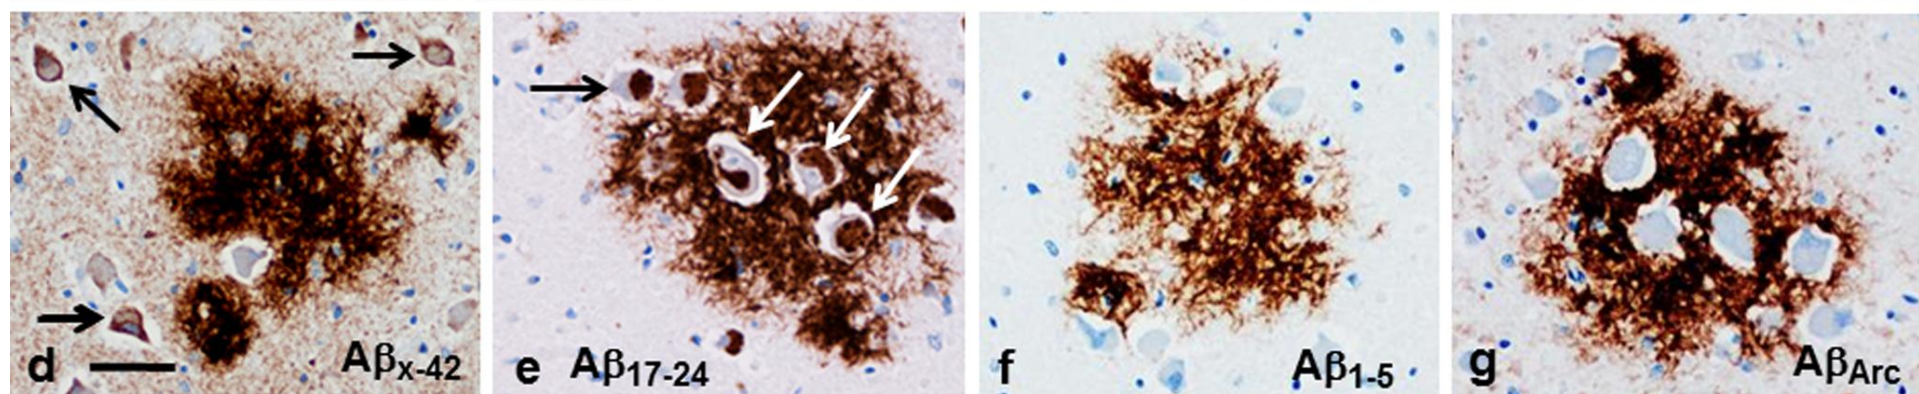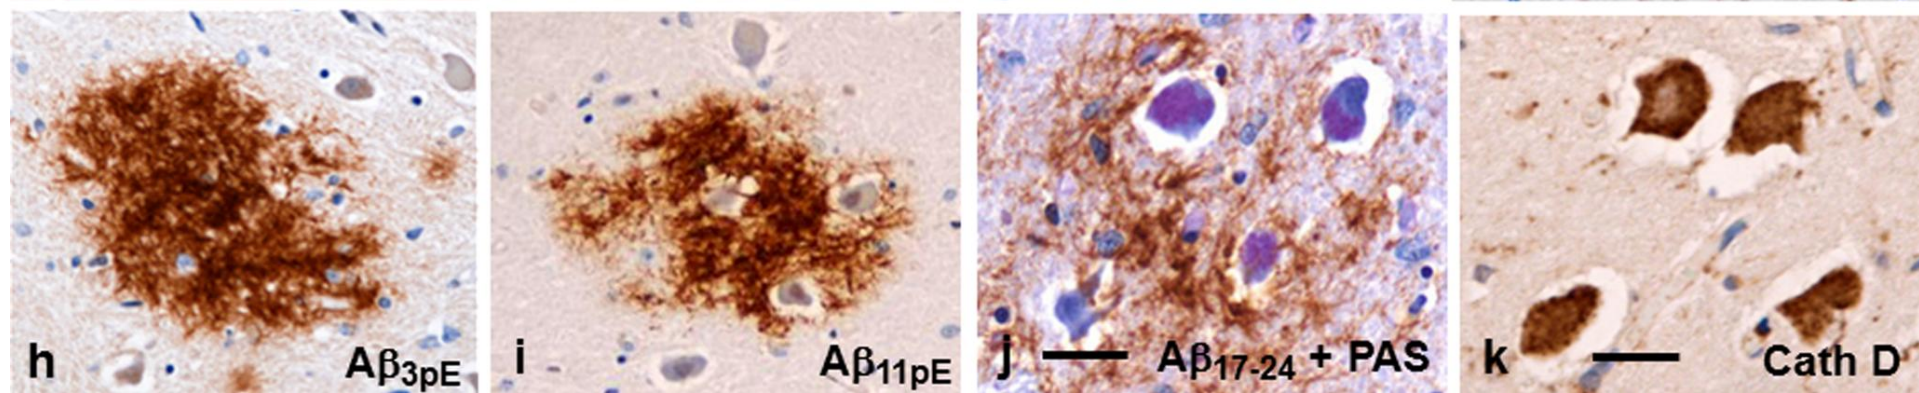

**Suppl. Fig. 5 a-k:** Sw2 patient's medulla. A few compact plaques are positive with C-terminal (**a**), mid-domain (**b**) and N-terminal antibodies (**c**). Remarkably, abA $\beta_{x-42}$  renders the neuropil in inferior olivary nucleus distinctly positive (**a** and **d**), whereas with the other antibodies it is negative (**b**, **c** and **e-i**). Both abA $\beta_{x-42}$  and abA $\beta_{17-24}$ , (**d** and **e**; arrows), but not the rest of A $\beta$  antibodies applied (**f-i**), stain granular inclusions in the cytoplasm of seemingly well preserved olivary neurons within and adjacent to plaques. The neuronal inclusions also stain with PAS (**j**) and an antibody to lysosomal cathepsin D (**k**). (*bar in a 350  $\mu$ m for a-c; bar in d 50  $\mu$ m for d-i; bar in j 25  $\mu$ m; bar in k 30  $\mu$ m*)
